# Supplementary material
Source: PubMed Central journal article supplement (PMC7269498)
Supplement: AAC.00142-20-s0001.pdf [file AAC.00142-20-s0001.pdf]

**TABLE S1** PCR primers utilized in this study

| <b>Primer name</b> | <b>Primer sequence (5'-3')</b> | <b>Reference</b> |
|--------------------|--------------------------------|------------------|
| P1F1-F             | TCTCTGTTCCATGAACTCG            | This study       |
| P1F2-F             | TTGAGTGAAATACCTGTGCG           | This study       |
| P1R1-R             | CTAAATCATGGCTTGAGCATTAG        | This study       |
| P1R2-R             | TTTCTGAACCAAACAATTCTTCTG       | This study       |
| <i>cfr</i> -F      | GAATGAGAGAGTAGAAACGGTAA        | This study       |
| <i>cfr</i> -R      | TTTTCAATCCAATGTCGCCT           | This study       |
| <i>optrA</i> -F    | AACAGCTTGCTCAAATCAGT           | This study       |
| <i>optrA</i> -R    | GAGGACACCGGTCTAAAAAC           | This study       |
| <i>poxA</i> -F     | TGACAATGTGGAGTCTGAAG           | This study       |
| <i>poxA</i> -R     | ACGGGAATAGGGTTCAATTC           | This study       |
| <i>fexA</i> -F     | GTATTGGTGTGGAAGTCTGC           | This study       |
| <i>fexA</i> -R     | TGAACAGGACAGGTGGTACAA          | This study       |
| <i>cat</i> -F      | GGAAACTTGGGATAGAAAAGAATA       | This study       |
| <i>cat</i> -R      | CCATTCATTTACTATCAACCA          | This study       |

| <b>TABLE S2</b> Data from <i>optrA</i> -positive <i>E. faecalis</i> included in Figure 3  |
|-------------------------------------------------------------------------------------------|
| V1 <i>Enterococcus avium</i> [MH018573.1] human (fecal sample from a healthy child) China |
| V1 <i>Enterococcus faecalis</i> [KX620939.1] human China                                  |
| V1 <i>Staphylococcus sciuri</i> [KX447567.1] swine (nasal swabs) China                    |
| V1 <i>Staphylococcus sciuri</i> [KX447572.1] swine (nasal swabs) China                    |
| V1 <i>Staphylococcus sciuri</i> [KX982168.1] swine China                                  |
| V1 <i>Staphylococcus sciuri</i> [MF805731.1] <i>Sus scrofa</i> (ear swab) China           |
| V2 <i>Enterococcus faecalis</i> [CP028725.1] food animal (heifers) US                     |
| V3 <i>Staphylococcus simulans</i> [MF805730.1] <i>Sus scrofa</i> (ear swab) China         |
| V4 <i>Enterococcus faecium</i> [KT892063.1] human (blood) Italy                           |
| V5 <i>Streptococcus suis</i> [MK359990.1] swine (diseased lung) China                     |
| V6 <i>Staphylococcus sciuri</i> [KT601170.1] swine (nasal sample) China                   |
| V6 <i>Staphylococcus sciuri</i> [KX982166.1] swine China                                  |
| V6 <i>Staphylococcus sciuri</i> [KX982169.1] swine China                                  |
| V6 <i>Staphylococcus sciuri</i> [KX982171.1] swine China                                  |
| V7 <i>Enterococcus faecalis</i> [MF443374.1] ST103 human (bone/joint culture) Panama      |
| V8 <i>Enterococcus faecalis</i> [KT862781.1] ST16 human China                             |
| V8 <i>Enterococcus faecalis</i> [MH225413.1] human China                                  |
| V8 <i>Enterococcus faecalis</i> [NHNH01000009.1] ST86 urban wastewaters Tunisia           |
| V8 <i>Enterococcus faecium</i> [KX620938.1] human China                                   |
| V8 <i>Enterococcus faecium</i> [MH225417.1] human China                                   |
| V8 <i>Enterococcus faecium</i> [MK251152.1] <i>Sus scrofa</i> (fecal swab) China          |
| V9 <i>Enterococcus faecalis</i> L8 [CP042216.1] ST710 swine (faeces) Brazil               |
| V9 <i>Enterococcus faecalis</i> L9 [CP041776.1] ST29 swine (faeces) Brazil                |
| V10 <i>Enterococcus faecalis</i> [MF443378.1] ST86 human (blood culture) Ecuador          |
| V11 <i>Enterococcus faecalis</i> [KX620936.1] human China                                 |
| V12 <i>Enterococcus faecalis</i> L10 ST711 swine (faeces) Brazil                          |
| V12 <i>Enterococcus faecalis</i> L11 ST591 swine (faeces) Brazil                          |
| V12 <i>Enterococcus faecalis</i> L12 ST711 swine (faeces) Brazil                          |
| V12 <i>Enterococcus faecalis</i> L13 ST591 swine (faeces) Brazil                          |
| V12 <i>Enterococcus faecalis</i> L15 [CP042214.1] ST591 swine (faeces) Brazil             |
| V12 <i>Enterococcus faecalis</i> L16 ST591 swine (faeces) Brazil                          |
| V12 <i>Enterococcus faecalis</i> L18 ST591 swine (faeces) Brazil                          |
| V12 <i>Enterococcus faecalis</i> L21 ST591 swine (faeces) Brazil                          |
| V13 <i>Enterococcus faecalis</i> L14 [CP043725.1] ST330 swine (faeces) Brazil             |
| V13 <i>Enterococcus faecalis</i> L17 ST330 swine (faeces) Brazil                          |
| V13 <i>Enterococcus faecalis</i> L19 ST330 swine (faeces) Brazil                          |
| V13 <i>Enterococcus faecalis</i> [KT862782.1] ST27 human China                            |

|                                                                                          |
|------------------------------------------------------------------------------------------|
| V14 <i>Streptococcus suis</i> [MK359991.1] swine (diseased lung) China                   |
| V13 <i>Enterococcus faecalis</i> [KT862785.1] ST21 chicken China                         |
| V13 <i>Enterococcus faecalis</i> [KU354267.1] swine (faeces) China                       |
| V13 <i>Enterococcus faecalis</i> [KX620933.1] human China                                |
| V13 <i>Enterococcus faecium</i> [CP040236.1] human (pus) India                           |
| V13 <i>Enterococcus faecium</i> [CP040238.1] human (pus) India                           |
| V13 <i>Enterococcus faecium</i> [CP040368.1] human (pus) India                           |
| V13 <i>Enterococcus faecium</i> [KY579372.1] human Ireland                               |
| V15 <i>Enterococcus faecalis</i> [MF443373.1] ST16 human (skin/soft tissue) Thailand     |
| V16 <i>Streptococcus pasteurianus</i> [KY828437.1] human (urine) Thailand                |
| V17 <i>Enterococcus faecium</i> [MK251153.1] Sus scrofa (fecal swab) China               |
| V17 <i>Enterococcus faecium</i> [MK251154.1] Sus scrofa (fecal swab) China               |
| V17 <i>Streptococcus suis</i> [MK359989.1] swine (diseased lung) China                   |
| V18 <i>Enterococcus faecalis</i> [CP030042.1] ST691 swine China                          |
| V18 <i>Enterococcus faecalis</i> [MK251150.1] Sus scrofa (fecal swab) China              |
| V19 <i>Enterococcus faecalis</i> [KT862783.1] ST476 human China                          |
| V19 <i>Enterococcus faecalis</i> [MH018572.1] human (fecal sample/ healthy person) China |
| V19 <i>Enterococcus faecalis</i> [MH225416.1] human China                                |
| V19 <i>Enterococcus faecalis</i> [MH225421.1] human China                                |
| V19 <i>Enterococcus faecalis</i> [MH225424.1] human China                                |
| V19 <i>Enterococcus faecalis</i> [MH830363] swine (manure) China                         |
| V20 <i>Enterococcus faecalis</i> [KT862777.1] ST480 human China                          |
| V20 <i>Enterococcus faecalis</i> [KT862779.1] ST330 chicken China                        |
| V20 <i>Enterococcus faecalis</i> [KX579977.1] chicken China                              |
| V20 <i>Enterococcus faecalis</i> [KX620940.1] human China                                |
| V21 <i>Enterococcus faecalis</i> [MH225423.1] human China                                |
| V22 <i>Enterococcus faecalis</i> [KT862784.1] ST93 swine China                           |
| V22 <i>Enterococcus faecalis</i> [KX620937.1] human China                                |
| V22 <i>Enterococcus faecalis</i> [MF443377.1] ST767 human (blood culture) Taiwan         |
| V22 <i>Enterococcus faecalis</i> [MF443386.1] ST766 human (plueral fluid) Taiwan         |
| V22 <i>Enterococcus faecium</i> [MK251151.1] Sus scrofa (fecal swab) China               |
| V22 <i>Staphylococcus sciuri</i> [KX447566.1] swine (nasal swabs) China                  |
| V22 <i>Staphylococcus sciuri</i> [KX447568.1] swine (nasal swabs) China                  |
| V22 <i>Staphylococcus sciuri</i> [KX447569.1] swine (nasal swabs) China                  |
| V22 <i>Staphylococcus sciuri</i> [KX447570.1] swine (nasal swabs) China                  |
| V22 <i>Staphylococcus sciuri</i> [KX447571.1] swine (nasal swabs) China                  |
| V22 <i>Staphylococcus sciuri</i> [KX982167.1] swine China                                |
| V22 <i>Staphylococcus sciuri</i> [KX982170.1] swine China                                |

|                                                                                                |
|------------------------------------------------------------------------------------------------|
| V22 <i>Staphylococcus sciuri</i> [KX982173.1] swine China                                      |
| V22 <i>Staphylococcus sciuri</i> [KX982174.1] swine China                                      |
| V22 <i>Staphylococcus sciuri</i> [KY056650.1] swine China                                      |
| V22 <i>Staphylococcus sciuri</i> [MF805732.1] <i>Canis lupus familiaris</i> (nasal swab) China |
| V14 <i>Enterococcus faecium</i> [CP028728.1] food animal (cattle-steer) US                     |
| V23 <i>Streptococcus suis</i> [CP030125.1] swine (tonsil) China                                |
| V13 <i>Enterococcus faecalis</i> [MH225418.1] human China                                      |
| V24 <i>Enterococcus</i> spp. [MK425644.1]                                                      |
| V25 <i>Enterococcus faecalis</i> [MF443380.1] ST59 human (blood culture) Malaysia              |
| V26 <i>Enterococcus faecalis</i> [MF443385.1] ST775 human (blood culture) France               |
| V19 <i>Enterococcus faecalis</i> [KP399637.1] ST116 human (blood) China                        |
| V19 <i>Enterococcus faecalis</i> [KT862780.1] ST27 swine China                                 |
| V27 <i>Enterococcus faecalis</i> [MK993385.1] human (necrotic tissues) China                   |
| V19 <i>Enterococcus faecalis</i> [MF443375.1] ST116 human (ureteral catheter) Ireland          |
| V28 <i>Enterococcus faecalis</i> [MF443372.1] ST116 human (abscess/ pus) China                 |
| V19 <i>Enterococcus faecalis</i> [KX620932.1] human China                                      |
| V19 <i>Enterococcus faecalis</i> [KY513280.1] ST116 human (pus) Poland                         |
| V19 <i>Enterococcus faecalis</i> [LC371257.1] human (urine) Japan                              |
| V19 <i>Enterococcus faecalis</i> [MF443368.1] ST116 human (skin/soft tissue) China             |
| V19 <i>Enterococcus faecalis</i> [MF443381.1] ST41 human (urine) Ireland                       |
| V19 <i>Enterococcus faecalis</i> [MF443382.1] ST768 human Ireland                              |
| V19 <i>Enterococcus faecalis</i> [NG048023.1] China                                            |
| V19 <i>Streptococcus suis</i> [CP017667.1] <i>Sus scrofa</i> (tonsil scrape) China             |
| V29 <i>Enterococcus faecalis</i> [CP030043.1] swine (fecal swab) China                         |
| V29 <i>Enterococcus faecalis</i> [CP030046.1] ST74 swine China                                 |
| V29 <i>Enterococcus faecalis</i> [KX620942.1] human China                                      |
| V29 <i>Enterococcus faecalis</i> [MF443384.1] ST256 human (wound/drainage/ulcer) Guatemala     |
| V29 <i>Enterococcus faecalis</i> [MH225420.1] human China                                      |
| V29 <i>Enterococcus faecalis</i> [MH225422.1] human China                                      |
| V29 Uncultured bacterium [KU736872.1] swine (manure) China                                     |
| V29 Uncultured bacterium [KU736873.1] swine (manure) China                                     |
| V30 <i>Enterococcus faecalis</i> [KX620934.1] human China                                      |
| V31 <i>Enterococcus faecalis</i> [LC499744.1] human (bile) Japan                               |
| V31 <i>Enterococcus faecalis</i> [MF443367.1] ST67 human (blood culture) Sweden                |
| V31 <i>Enterococcus faecalis</i> [MK140641.1] ST692 swine China                                |
| V20 <i>Enterococcus faecalis</i> [AP018542.1] human (urine) Japan                              |
| V20 <i>Enterococcus faecalis</i> [AP018547.1] human Japan                                      |
| V20 <i>Enterococcus faecalis</i> [CP028723.1] food animals US                                  |

|                                                                                         |
|-----------------------------------------------------------------------------------------|
| V20 <i>Enterococcus faecalis</i> [MH225414.1] human China                               |
| V20 <i>Enterococcus faecalis</i> [MH225419.1] human China                               |
| V32 <i>Enterococcus faecalis</i> [KX620941.1] human China                               |
| V32 <i>Enterococcus faecalis</i> [MH225415.1] human China                               |
| V33 <i>Enterococcus faecalis</i> [MH225425.1] human China                               |
| V34 <i>Enterococcus faecalis</i> [KT862775.1] ST59 swine China                          |
| V34 <i>Enterococcus faecalis</i> [KT862776.1] ST480 human China                         |
| V34 <i>Enterococcus faecalis</i> [KT862778.1] ST622 swine China                         |
| V34 <i>Enterococcus faecalis</i> [KX620935.1] human China                               |
| V34 <i>Enterococcus faecalis</i> [MF443369.1] ST632 human (urine/urinary tract) China   |
| V34 <i>Enterococcus faecalis</i> [MF443370.1] ST69 human (urine/urinary tract) China    |
| V34 <i>Enterococcus faecalis</i> [MF443371.1] ST69 human (blood culture) China          |
| V34 <i>Enterococcus faecalis</i> [MF443376.1] ST585 human (wound/drainage/ulcer) China  |
| V34 <i>Enterococcus faecalis</i> [MF443379.1] ST585 human (urine) US                    |
| V34 <i>Enterococcus faecalis</i> [MF443383.1] ST179 human (ureteral catheter) US        |
| V34 <i>Enterococcus faecalis</i> [MF443387.1] ST480 human (wound/drainage/ulcer) Mexico |
| V34 <i>Enterococcus faecalis</i> [MF443388.1] ST480 human (urine) Mexico                |
| V34 <i>Enterococcus</i> spp. [MK425645.1]                                               |

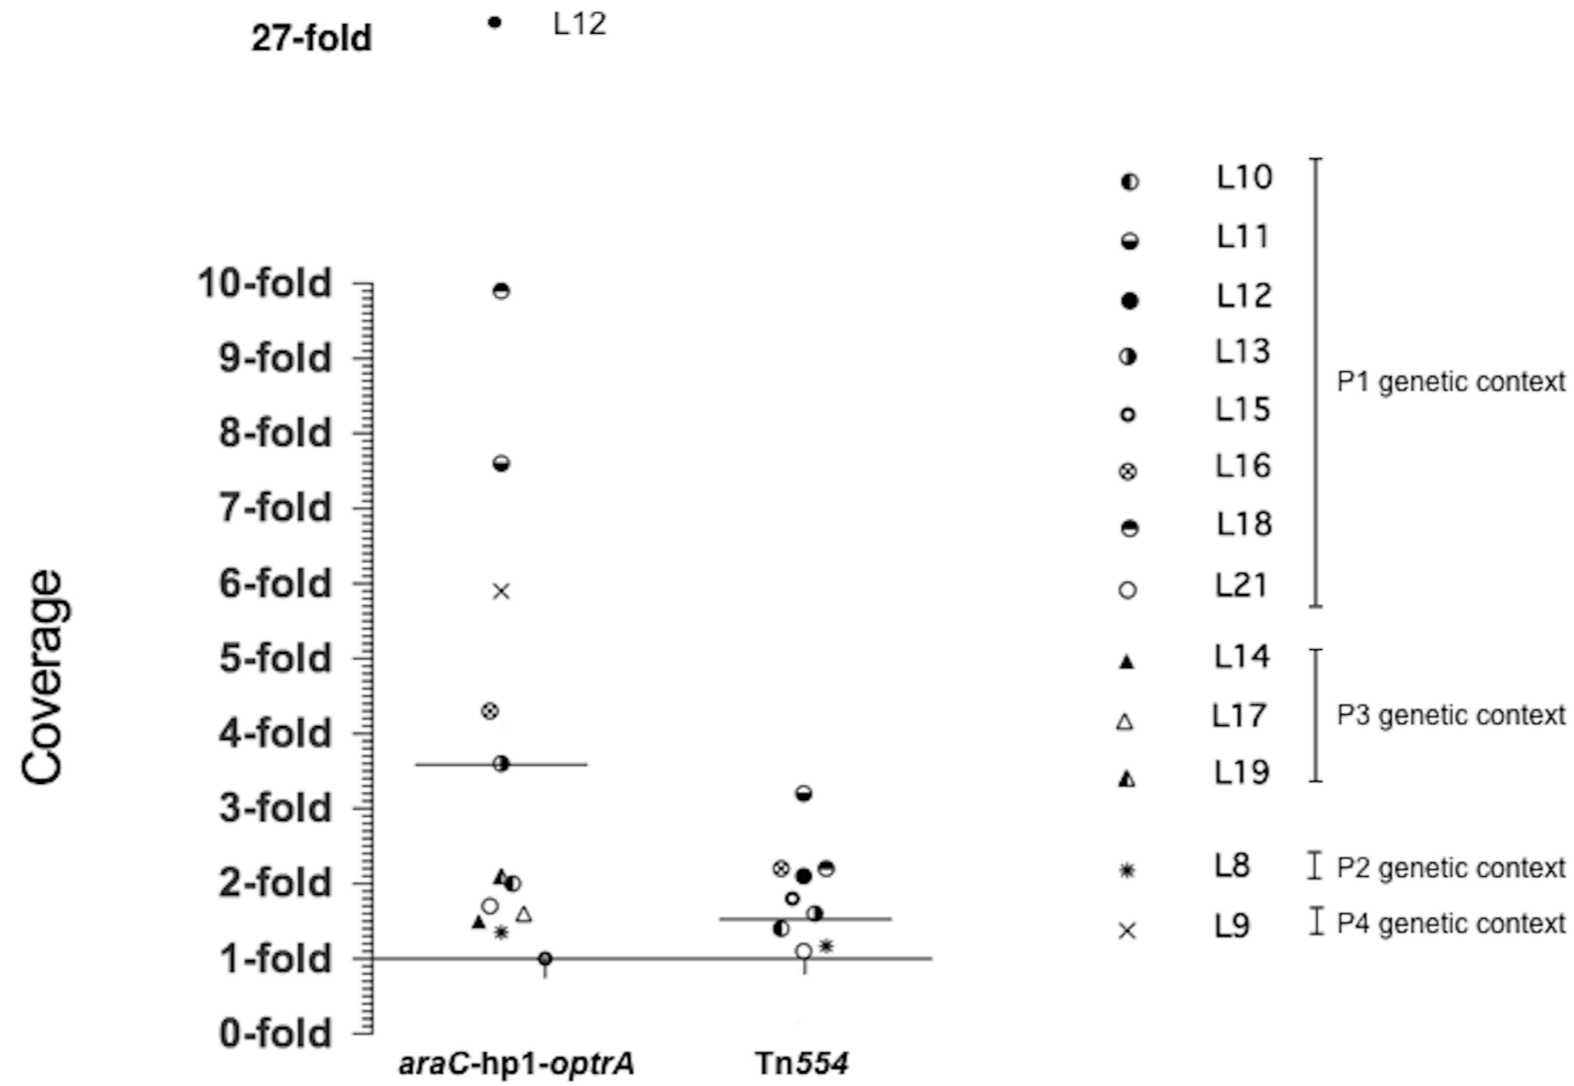

Figure S1 (Supplemental data). Areas of coverage predicted *in silico*. Read counts for the 3,453-bp *araC-hp1-optrA* core and 6,568-bp Tn554 were compared to the chromosome read count, which was set as 1-fold. The *araC-hp1-optrA* core had a great disparity in copy number (from 1 to 27-fold coverage compared to the chromosome).

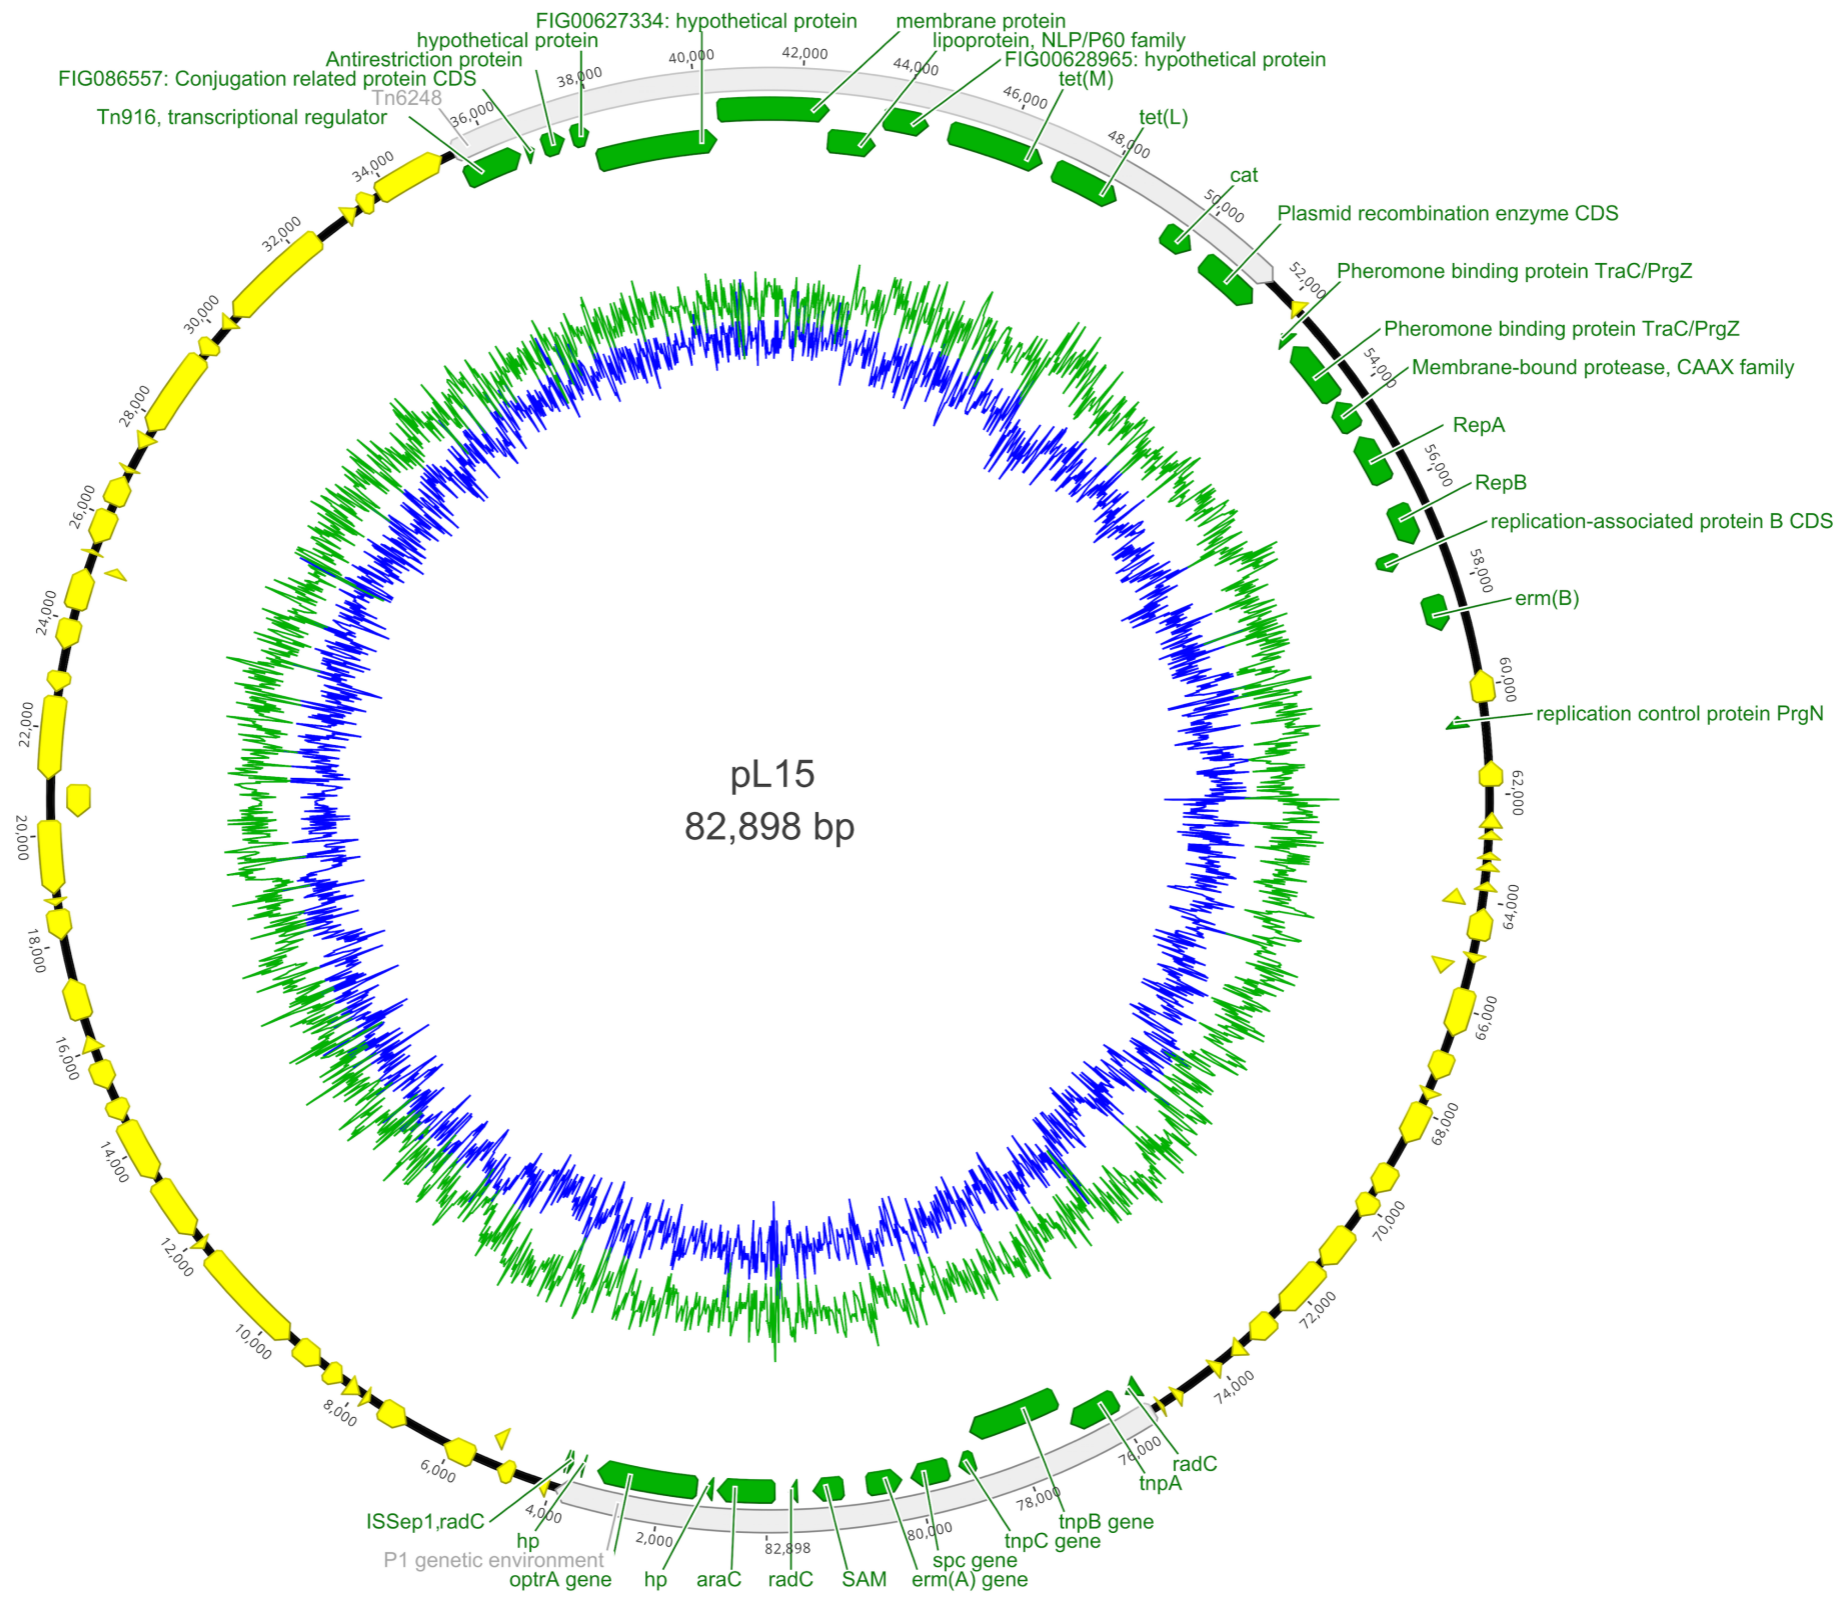

**Figure S2 (Supplemental data). Plasmid 82,898-bp pL15.** An intact 11,007-bp P1 context and coding sequences for other resistance genes are indicated.
